# Supplementary material
Source: PubMed Central journal article supplement (PMC3713627)
Supplement: NIHMS485061-supplement-Figure_S1.pdf [file NIHMS485061-supplement-Figure_S1.pdf]

Chr9:130,291,275

Prox Chr9 ACCACCCAGTCCGCCCCAGATCCTGGGGAGCTCGAATGGGTGGCTGGCT  
Patient 4 ACCACCCAGTCCGCCCCAGATCTGGCGGGCGGATCACGAGGTCAGGAGT  
Dist Chr9 AATCCCAGCACTTCGGGAGGCCAAGGCCGGGCGGATCACGAGGTCAGGAGT

Patient 4

Chr9:130,554,161

Chr9:130,353,635

Prox Chr9 GGGTTCACGCCATTTCGCCTGCCTCAGACTCCTGAGTAGCTGGGACTACAG  
Patient 5 GGGTTCACGCCATTTCGCCTGCCTCAGCCTCCCAAGTAGCTGGGATTACAG  
Dist Chr9 AGGTTCAAGAGATTCTCCTGCCTCAGCCTCCCAAGTAGCTGGGATTACAG

Patient 5

Chr9:130,421,322

Chr9:130,956,099

Prox Chr9 AATCGTGACTCCCCTGCCTTGTGGCTAGGTGACACTGGCTGGGGGAGAGG  
Patient 6 AATCGTGACTCCCCTGCCTTGTAGCCATCTCATAAAGATAACCAGTAAGAT  
Dist Chr9 TCCTCTGTGTGAGTCCGATTTTCTCATCTCATAAAGATAACCAGTAAGAT

Patient 6

Chr9:132,603,590

Chr9:129,843,508

Prox Chr9 ATGCTAAAATGATAGGCACAAAAT-GGCATTTTTTTTTAAATATACATTT  
Patient 10 ATGCTAAAATGATAGGCACAAAATAGGCACAAAGTAAGGACAAGAAATTT  
Dist Chr9 TATGTCACAACCTCCTGCTAAAGTAAGGACAAGAAATTTCCAATCAGCTC

Patient 10

Chr9:130,681,956
